# Supplementary material for: Norepinephrine Inhibits the Proliferation of Human Bone Marrow-Derived Mesenchymal Stem Cells via β2-Adrenoceptor-Mediated ERK1/2 and PKA Phosphorylation
Source: MDPI journal article supplement (doi:10.3390/ijms21113924), 2020-05-30
Supplement: s1 [file s1]

## Supplementary Material

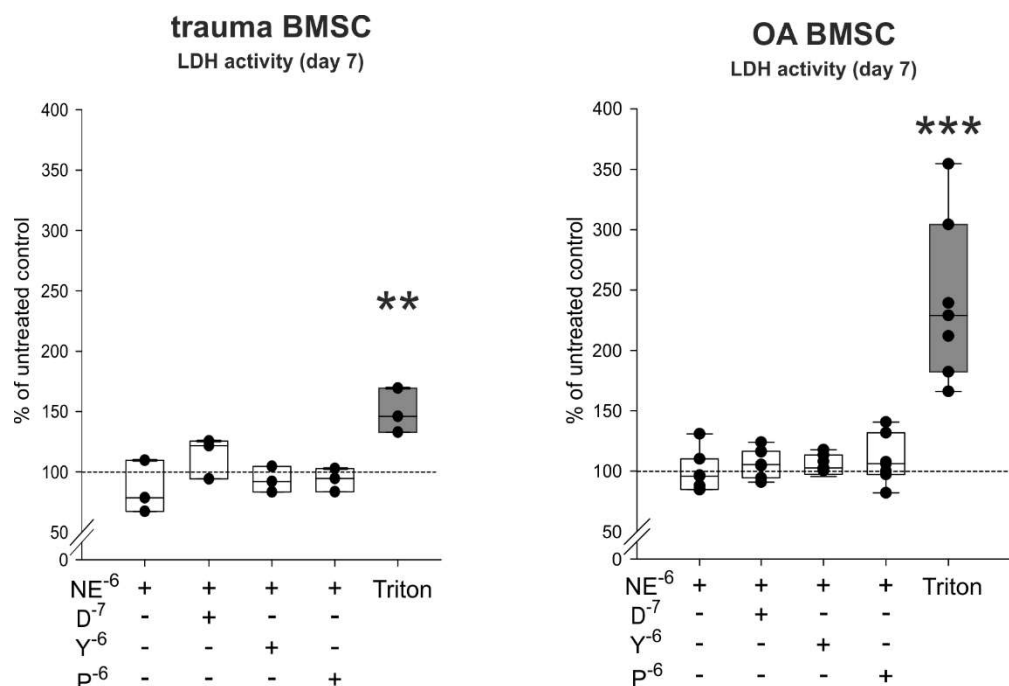

**Supplementary Figure 1.** LDH release of trauma and OA BMSCs after 7 days of treatment with NE alone and in combination with AR antagonists in monolayer culture (n=3-7). Data are presented as box plots as described in the legend to figure 1 and as percent of the untreated control (control= 100 %, broken line). Significant p values are presented as \*\*p≤0.01 or p≤0.001 to the untreated control. Abbreviations: D-7 – doxazosin ( $\alpha$ 2-AR antagonist); Y-6 – yohimbine ( $\alpha$ 2-AR antagonist); P-6 – propranolol ( $\beta$ 2-AR-antagonist)

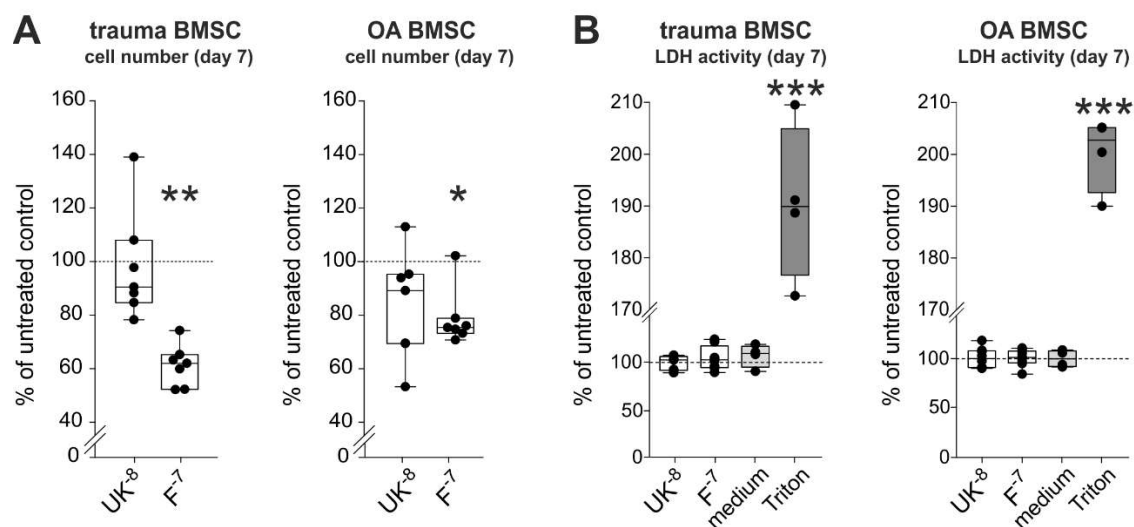

**Supplementary Figure 2.** Effect of AR agonists on the proliferation and viability of trauma and OA BMSCs (A) Vital cell count of trauma and OA BMSCs 7 days after treatment with  $\alpha$ 2-AR-agonist UK14,304 (UK,  $10^{-8}$  M) and  $\beta$ 2-AR-agonist formoterol (F,  $10^{-7}$  M) (trauma BMSCs: p<0.001 for F  $10^{-7}$  M vs. untreated control, OA BMSCs: p=0.026 for F  $10^{-7}$  M vs. untreated control; n=7). (B) LDH release of trauma and OA BMSCs after treatment with  $\alpha$ 2-AR-agonist UK14,304 (UK,  $10^{-8}$  M) and  $\beta$ 2-AR-agonist formoterol (F,  $10^{-7}$  M) (n=4). Data are presented as box plots as described in the legend to Figure 1 and as percent of the untreated control (control= 100 %, broken line). Significant p values are presented as \*p≤0.05, \*\*p≤0.01 and \*\*\*p<0.001 to the untreated control.

### trauma BMSC

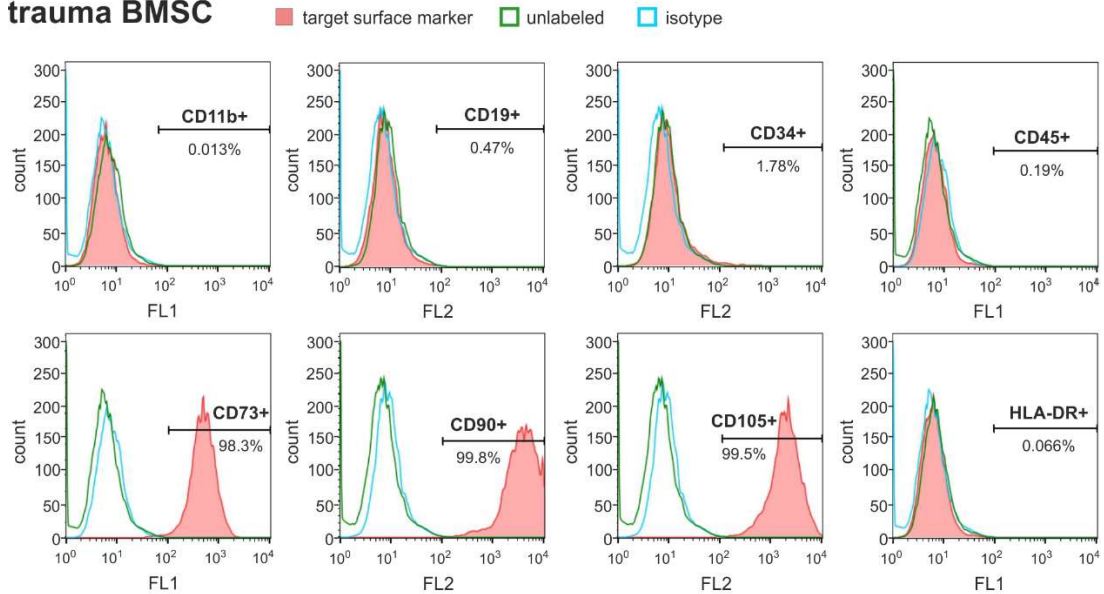

### OA BMSC

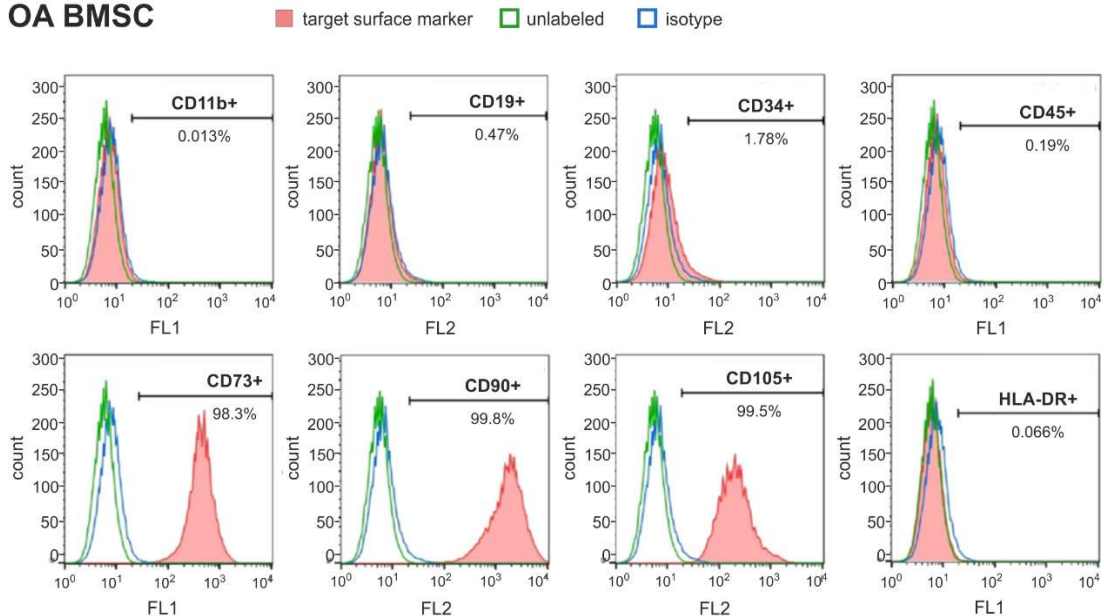

**Supplementary Figure 3.** Characterization of MSC-specific surface markers of BMSCs isolated from trauma and OA donors. BMSCs of both donor groups were negative for CD11b, CD19, CD34, CD45, and HLA-DR and were positive for CD73, CD90, and CD105 as suggested by *The Mesenchymal and Tissue Stem Cell Committee of the International Society for Cellular Therapy* (representative FACS analysis pictures of n=1 trauma and n=1 OA BMSCs).
